# Supplementary material
Source: Springer Nature journal article supplement (https://www.springermedizin.de/resource/supplementary/12960_2003_10_MOESM2_ESM.pdf/9569724)
Supplement: MOESM2 [file 9569724]

### **National level**

- Policy, rules and regulations
- Universities, teaching hospitals

### **Provincial level**

- Preventive medicine, medical schools, provincial hospitals, local supplies
- Coverage: 8-12 districts; 1,2 million people

### **District level**

- Primary and 1st level curative and preventive services
- Team of hygiene and epidemiology (8-15 staff, medical doctors, assistant doctors, nurses) supporting vertical programs, disease surveillance and prevention in the districts
- Coverage: 10-20 communes; 100,000- 150,000 people

### **Commune level**

- Primary health care services, including maternal care
- In general: 3-4 health staff: medical doctor, assistant doctor, nurse, midwife or pharmacist
- Policy: each centre headed by a medical doctor, reality: 40%
- Coverage: average of 6,000 people
